# Supplementary material for: A negative feedback regulatory loop between miR-138 and TP53 is mediated by USP10
Source: PubMed Central journal article supplement (PMC6824876; doi:10.18632/oncotarget.27275), 2019-10-29
Supplement: oncotarget-10-6288-s001.pdf [file oncotarget-10-6288-s001.pdf]

## A negative feedback regulatory loop between miR-138 and TP53 is mediated by USP10

### SUPPLEMENTARY MATERIALS

|         |                               |            |                               |
|---------|-------------------------------|------------|-------------------------------|
| Human   | GUCUCAUUGCUUAGUAGAAUA-AAUCCUG | CACCAGCA   | ACAA-CACUUGUAAAUU             |
| Chimp   | GUCUCAUUGCUUAGUAGAAUA-AGUCCUG | CACCAGCA   | ACAA-CACUUGUAAAUU             |
| Mouse   | GUCUGAUCGCGUAGUGGAAUA-AGUCCCG | CACCAGCAGC | ----UCUUGUAAAUU--UGUG-AAAAU   |
| Rat     | GUUUGAU-GCGUAGUGGAAUA-AGUCCCG | CACCAGCAGC | ----UCUUGUAAAUU--UGUG-AAAAU   |
| Pig     | GUCUCAUUGCGUAGUAGAAUA-AAUCCUG | CACCAGCAAC | ----ACUUGUAAAUU--UGUG-AAAAU   |
| Cow     | GUCUAAUUGCAUAGUAGAGUA-AGUCCUG | CACCAGCA   | ACAA-CACUUGUAAAUU--UGUG-AAAAU |
| Dog     | GUCUAAUUGCUUAGUAGAAUA-AAUCCUG | CACCAGCA   | ---A-CACUUGUAAAUU--UGUG-AAAAU |
| USP10   | 5' ...GUAGAAUAAAU             | CCUGCACCA  | GCA...                        |
|         |                               |            |                               |
| miR-138 | 3' GCCGGACUAAGUGUUGUGGUCGA    |            |                               |

**Supplementary Figure 1: miR-138 targets USP10.** The targeting sequence is highlighted in red which is highly conserved in mammals.
